# Supplementary material for: Luminescence from π–π stacked bipyridines through arene–perfluoroarene interactions
Source: Royal Society of Chemistry journal article supplement (doi:10.1039/b822007g), 2009-01-01
Supplement: b822007g.pdf [file b822007g.pdf]

## SUPPORTING INFORMATION

### Luminescence from $\pi$ - $\pi$ Stacked Bipyridines through Arene-Perfluoroarene Interactions

A. Hori,\* S. Takatani, T. K. Miyamoto, M. Hasegawa

\*To whom the correspondence should be addressed (e-mail: hori@kitasato-u.ac.jp)

|                                                      |       |      |
|------------------------------------------------------|-------|------|
| 1. Syntheses and physical properties of <b>1-3</b> . | ..... | p. 1 |
| 2. Crystal structures of <b>1</b> and <b>2</b> .     | ..... | p. 2 |
| 3. Solid-state luminescence spectra of <b>1-3</b> .  | ..... | p. 3 |
| 4. Absorption spectra of <b>1-3</b> .                | ..... | p. 4 |
| 5. Excitation spectra of <b>1-3</b> .                | ..... | p. 4 |

-----

#### 1. Syntheses and physical properties of **1-3**.

**4,4'-Diphenylethynyl-2,2'-bipyridine (1).** Compound **1** was prepared using the Sonogashira cross-coupling reaction similar to previously reported procedures.<sup>1,2</sup> Iodobenzene (300 mg, 1.47 mmol) was added to a triethylamine solution (10 mL) of 4,4'-diethynyl-2,2'-bipyridine (100 mg, 0.49 mmol),<sup>2</sup> Pd(PPh<sub>3</sub>)<sub>2</sub>Cl<sub>2</sub> (11 mg, 15.7×10<sup>-3</sup> mmol), and CuI (3 mg, 15.7×10<sup>-3</sup> mmol) under a N<sub>2</sub> atmosphere. The reaction mixture was stirred at reflux for 6 h. The solvent was removed by distillation and the residue was extracted using dichloromethane from the aqueous phase along with a small amount of ethylenediamine. The organic layer was then dried by MgSO<sub>4</sub> and concentrated by evaporation. It was purified by flash column chromatography (silica, 99:1 CH<sub>2</sub>Cl<sub>2</sub>/MeOH) and crystallization from a CH<sub>2</sub>Cl<sub>2</sub>/hexane solution to give a white powder of **1**. Yield 76%. mp 205 °C. <sup>1</sup>H NMR (600 MHz, CDCl<sub>3</sub>, TMS)  $\delta$  8.69 (d, *J* = 5.1 Hz, 2H, PyH), 8.55 (s, 2H, PyH), 7.58 (dd, *J* = 7.2 Hz, 4H, PhH), 7.42 (d, *J* = 5.1 Hz, 2H, PyH), 7.42-7.39 (m, 6H, PhH). EI-MS *m/z* 356 (M). IR (KBr disk, cm<sup>-1</sup>) 3436, 2217, 1599, 1585, 1533, 1485, 1442, 1361, 989, 763, 754. Elemental analysis: Calcd for C<sub>26</sub>H<sub>16</sub>N<sub>2</sub> (%): C 87.62, H 4.52, N 7.86; found: C 87.44, H 4.60, N 8.12. It was recrystallized from benzene/hexafluorobenzene as **1**•C<sub>6</sub>F<sub>6</sub>, suitable for X-ray crystallography.

**4,4'-Bis(pentafluorophenylethynyl)-2,2'-bipyridine (2).** Compound **2** was prepared from iodopentafluorobenzene and 4,4'-diethynyl-2,2'-bipyridine using the same conditions for **1**. Yield 59%. mp 241 °C. <sup>1</sup>H NMR (600 MHz, CDCl<sub>3</sub>, TMS)  $\delta$  8.74 (d, *J* = 4.5 Hz, 2H, PyH), 8.60 (s, 2H, PyH), 7.49 (d, *J* = 4.5 Hz, 2H, PyH). EI-MS *m/z* 536 (M). IR (KBr disk, cm<sup>-1</sup>) 3421, 3068, 2926, 1586, 1517, 1498, 1359, 1123, 987, 973, 843. Elemental analysis: Calcd for

$C_{26}H_6F_{10}N_2$  (%): C 58.23, H 1.13, N 5.22; found: C 58.48, H 1.13, N 5.27. It was recrystallized from benzene/hexafluorobenzene as **2**, and suitable for X-ray crystallography.

**Cocrystal of 3 (= 1•2).** Compounds **1** (36 mg, 0.1 mmol) and **2** (54 mg, 0.1 mmol) were completely dissolved in hot benzene (3 mL). The mixture was cooled to room temperature to give a white powder of **3**. Yield 70%. mp 220 °C. Elemental analysis: Calcd for  $C_{52}H_{22}F_{10}N_4$  (%): C 69.96, H 2.48, N 6.28; found: C 70.35, H 2.53, N 6.39. It was recrystallized from benzene/hexane as 2(**3**)• $C_6H_6$ , and suitable for X-ray crystallography.

- 1) T. R. Kelly, Y.-J. Lee, R. J. Mears, *J. Org. Chem.*, 1997, **62**, 2774.
- 2) R. Ziessel, J. Suffert, M.-T. Youinou, *J. Org. Chem.*, 1996, **61**, 6535.

## 2. Crystal structures of 1 and 2.

(a) ORTEP drawing of **1**• $C_6F_6$  with 50% probability thermal ellipsoids at 100 K.

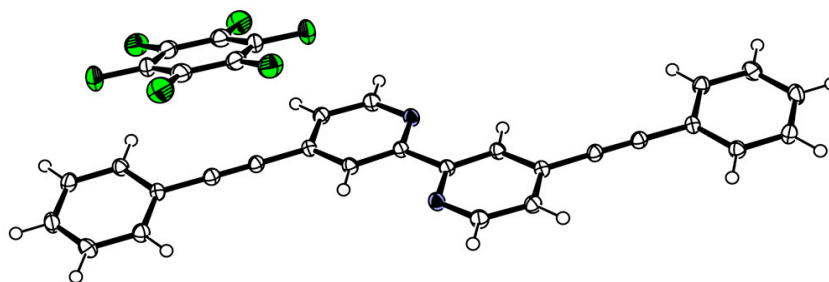

(b) ORTEP drawing of **2** with 50% probability thermal ellipsoids at 100 K.

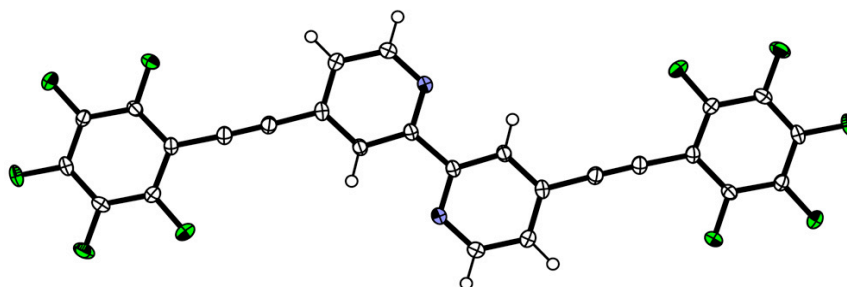

(c) Packing structures of **1**• $C_6F_6$  and **2**.

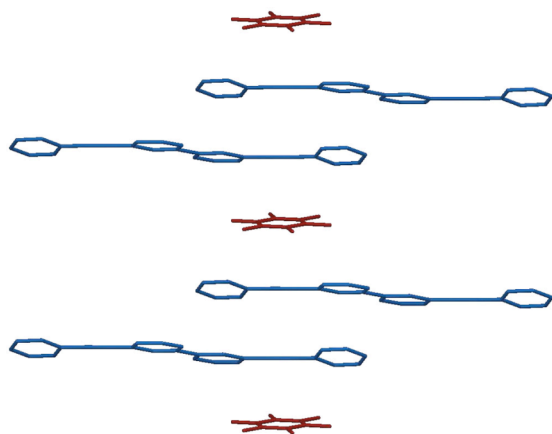

(Crystal packing of **1**• $C_6F_6$ : view along the *b*-axis)

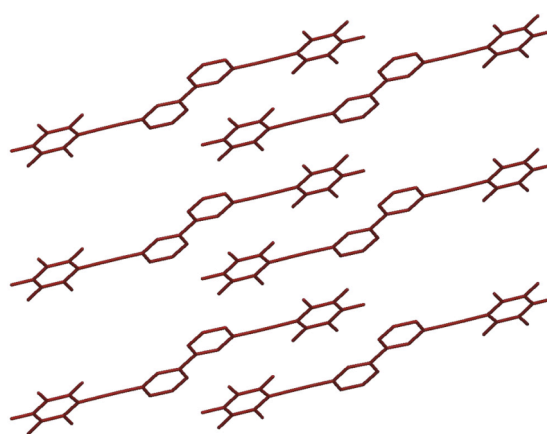

(Crystal packing of **2**: view along the *a*-axis)

### 3. Solid-state luminescence spectra of 1-3 at 77K.

The fluorescence band around 400 nm of **1** and **2** had vibronic bands, but that of **3** was broad (Fig. a). A small peak around 500 nm appeared for each, being assigned as a phosphorescence band. The time-resolved emission spectra of **1** (Fig. b), **2** (Fig. c), and **3** (Fig. d) at 77 K were measured using a chopper. The chopper speed of the emission detector for the phosphorescence measurements was changed to 46 ms (Low), 23 ms (Middle) and 15 ms (High) intervals using a Hitachi F3010 fluorophotometer with an attachment system.

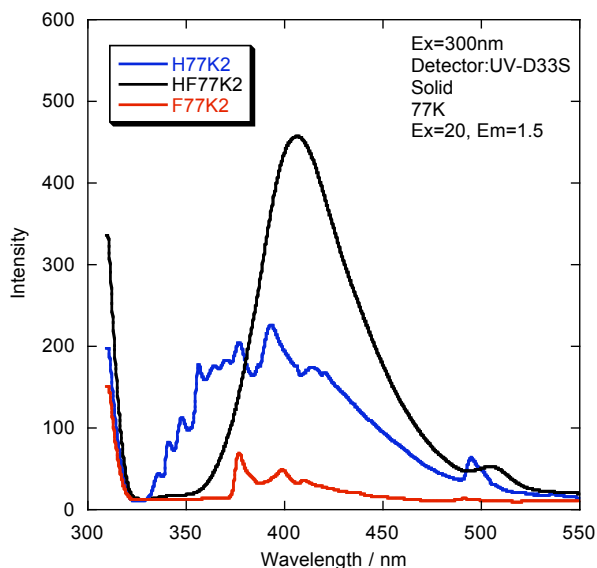

(a) Complexes **1-3** (77 K,  $\lambda_{\text{ex}}$  = 300 nm) without chopper.

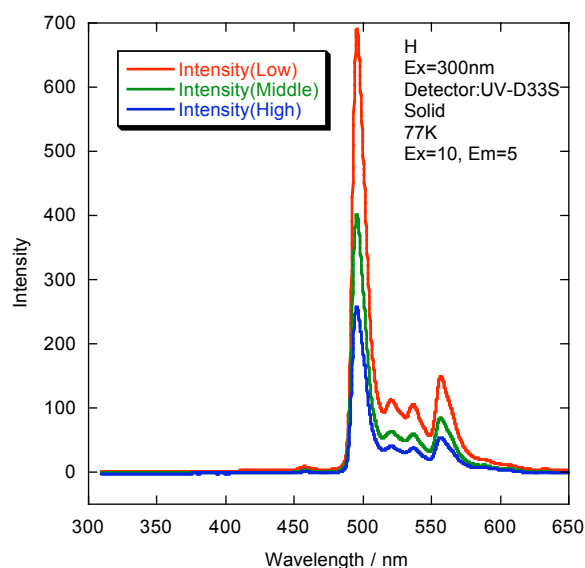

(b) Complex **1** with chopper

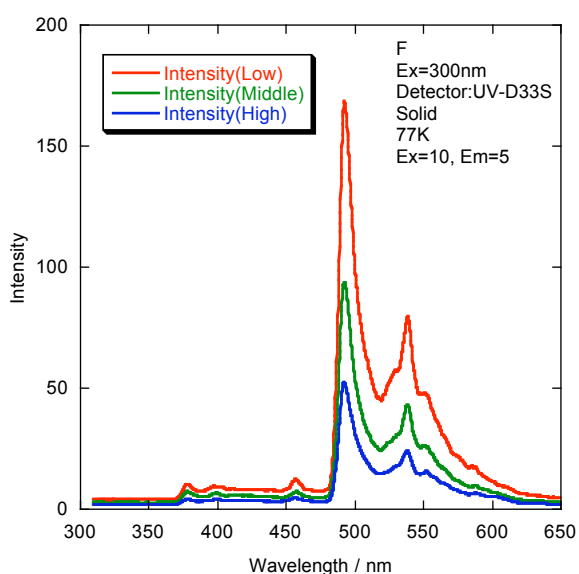

(c) Complex **2** with chopper

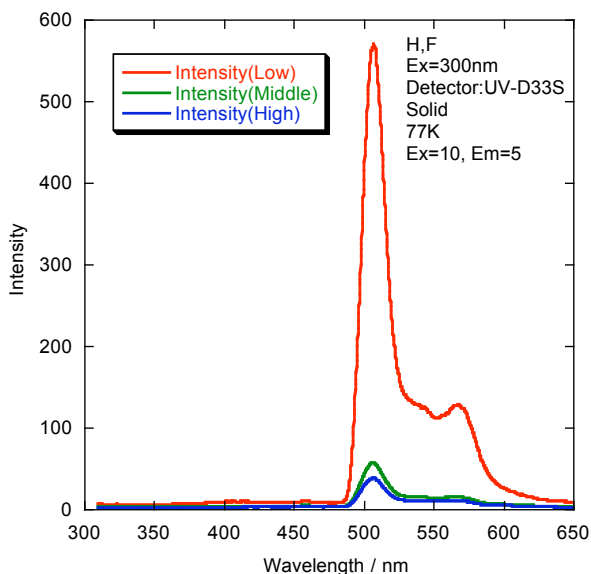

(d) Complex **3** with chopper

#### 4. Absorption spectra of 1-3 (Solid: left; solution: right).

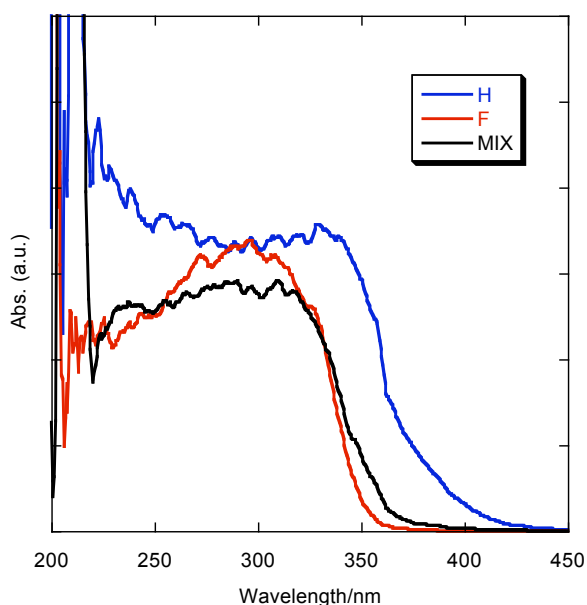

(a) Solid-state absorption spectra of 1-3.

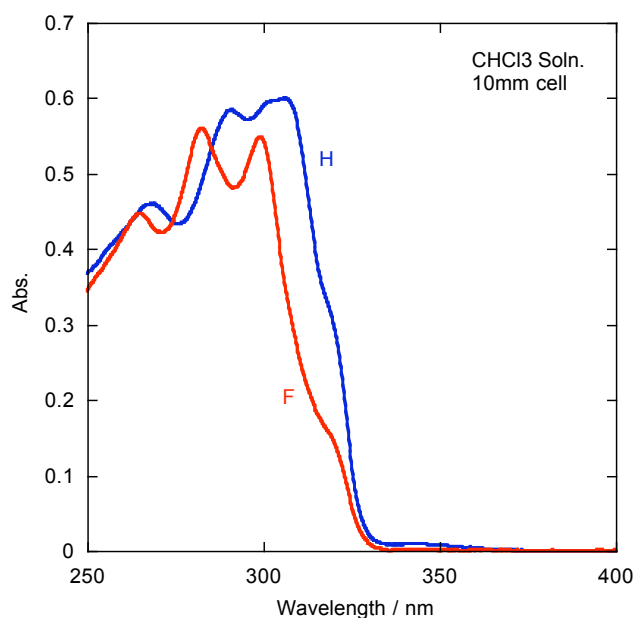

(b) Electronic absorption spectra of 1 and 2 in  $\text{CHCl}_3$  at r.t.

Diffused reflection spectra was exchanged by the Kbelba-Munk equation.<sup>3</sup>

3) P. Kubelka, F. Munk, *Z. Tech. Phys.*, 1931, **12**, 593.

#### 5. Excitation spectra of 1-3.

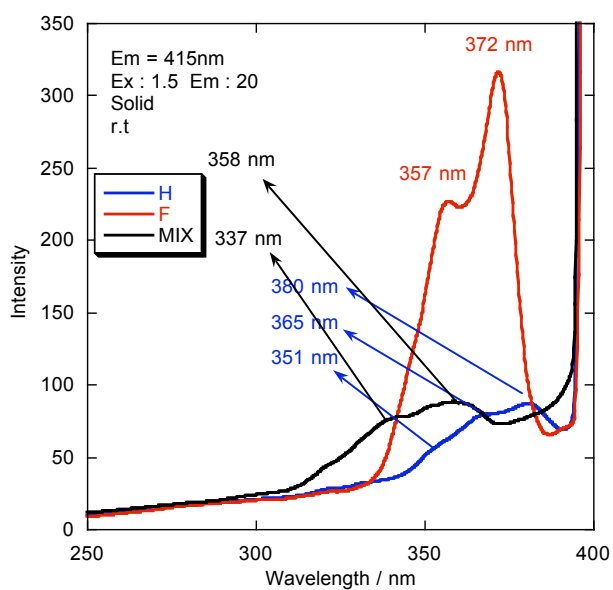

(a) Excitation spectra of complexes 1-3 (r.t.,  $\lambda_{\text{mon}} = 415 \text{ nm}$ ).

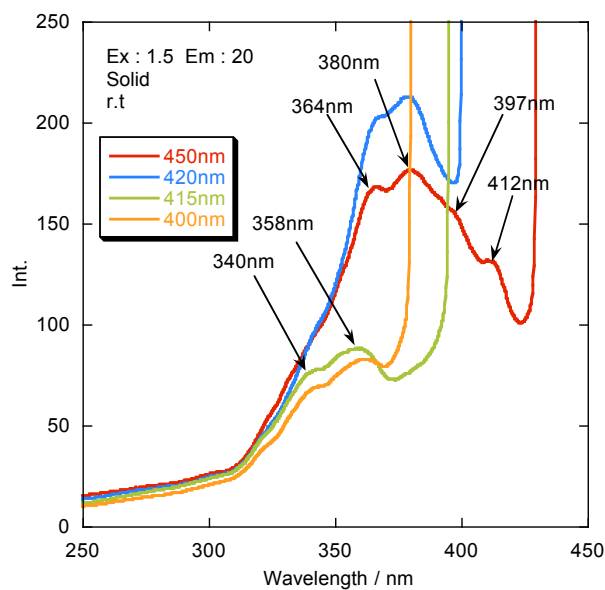

(b) Excitation spectra of Complex 3 monitored at various wavelength positions.
